# Supplementary material for: Chokeberry Extract and Its Active Polyphenols Suppress Adipogenesis in 3T3-L1 Adipocytes and Modulates Fat Accumulation and Insulin Resistance in Diet-Induced Obese Mice
Source: MDPI journal article supplement (doi:10.3390/nu10111734), 2018-11-12

## Chokeberry extract and its active polyphenols suppress adipogenesis in 3T3-L1 adipocytes and modulates fat accumulation and insulin resistance in diet-induced obese mice

**Supplement data 1.** Effect of *A. melanocarpa* extract on the histological changes of High Fat Diet -induced obese mice. Hepatocytes staining was carried out with the hematoxylin and eosin staining method. ND, normal diet group; VC, high-fat diet group; PC, Orlistat-treated group; T1, 100 mg/kg b.w. *A. melanocarpa* extract-treated group; T2, 200 mg/kg b.w. *A. melanocarpa* extract-treated group.

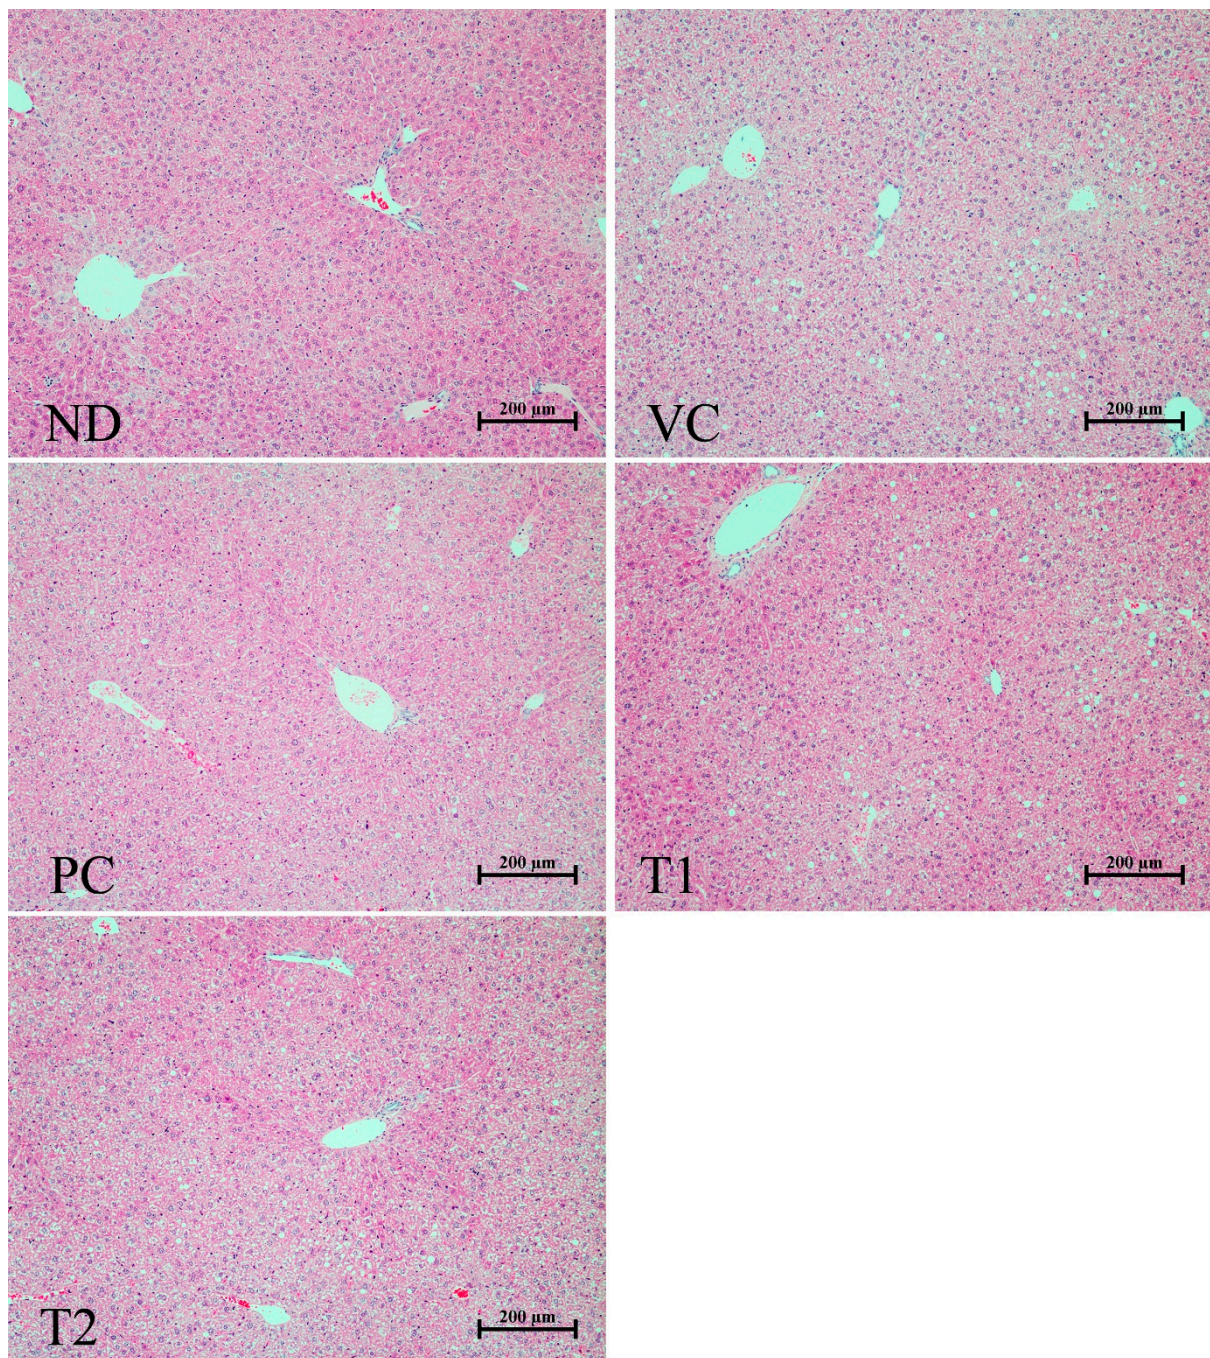

Supplement: s1 [file s1]
